# Supplementary material for: Gene Editing and Genotoxicity: Targeting the Off-Targets
Source: Front Genome Ed. 2020 Dec 10;2:613252. doi: 10.3389/fgeed.2020.613252 (PMC8525370; doi:10.3389/fgeed.2020.613252)
Supplement: Supplementary file 1 [file Table_1.XLSX]

## Sheet: Table 1
Table 1. Overview of unbiased DSB detection techniques
Technique	Type	Input	Clinical relevant cells	Quantification strategy	Validation rate$ (NGS validated sites/detected)	Main bioinformatics/filter features	Sensitivity* (lower limit of detection)	General drawbacks	General assets	References
IDLV capture	in cellula	100 - 1000 ng of gDNA	no	N/A	61.54% (13) validated (CCR5)	Clustered integration site (CLIS) analysis. CLIS defined by two or more integration sites separated by no more than 500 bp. Use of control samples where only IDLVs are transduced without designer nucleases	N/A	Need of IDLV transduction. Relatively low IDLV integration efficiency in DSB.	Good validation rate.	Gabriel et al., 2011
ITR-seq	in cellula	400 ng of gDNA	yes	Quantitative. Measured as: deduplicated reads from UMI barcoded linker (ITR-Seq reads).	78-89% (21/27 and 24/27 randomly chosen sites tested out of 2332)	- UMI consolidation - Reads must include 20 bases from AAV sequence. - ITR reads clustering within 50 bp window - Only consider sites with ITR integration mapped in both the positive and negative strand.	Could detect off-target sites that show indel frequencies as low as 0.07 %	Need of AAV transduction. The study encoded the nuclease into the AAV vector.	Performed from in-vivo liver transduced with AAV8 vector expressing the nuclease. Good validation experimental setup and rate.	Breton et al., 2020
GUIDE-seq	in cellula	400 ng of gDNA	no	Quantitative. 8bp barcode in adapter ligated after genomic DNA shearing Measured as: GUIDE-seq read count (=binned deduplicated reads using 8bp barcode + 6 first bases of sequence)	90.9% (VEGFA site 1; Validated off target sites comparison with other techniques. Kim et al., 2019) 44% validated (Top 18, FANCF and VEGFA site 3, sites tested out of 127. Turchiano et al., 2020) 90% (10) vailidated (Tmc1 site. Gao et al., 2018)	- Two or more unique, molecular-indexed reads mapping to opposite strands in the reference sequence or two or more unique molecular-indexed reads amplified by forward and reverse primers. - Off-targets with more than 8 missmatches in the 25 bp flanking each side of the on-target site are filtered out.	Detection of off-target sites that show indel frequencies as low as ~0.1%	Guide homology based filtering. False negatives possible due to the alignment threshold. No UT control possible. Nucleofection of dsODN	Good validation rate.	Tsai et al., 2015
DSB-seq	in cellula	500 μg of gDNA	no (possible)	Semi-quantitative Measured as: deduplicated read count	N/A	- Peak calling - Comparson with UT control	N/A	It was not validated with designer nucleases. High amoung of gDNA requested.	In cellula, fast protocol.	Baranello et al., 2014
BLESS	in cellula	5*10^6 cells (Crosetto et al., 2013) 1*10^7 cells (Ran et al., 2015)	no (possible)	Semi-quantitative Measured as: DSB score. It describes the number of expected Cas9-induced DSB clusters per 1x10e5 reads.	35% (Top 20 tested) [EMX1 site 1] 30% (Top 40 tested) [EMX site 2]	- Reads clustering to identify DSB groups - Reads pairwise minimal distance to filter out background signal - Comparison with UT control (Ran et al., 2015)	With designer nucleases sensitivity between 0.5-20% as compared with indels analysis via NGS. (Yan et al., 2017)	Fixation with formaldehyde interferes with end repair and adaptor ligation. Low sensitivity.	Good validation rate.	Crosetto et al., 2013 Ran et al., 2015
BLISS	in cellula	3 x 10^5 cells	no (possible)	Semi-quantitative. Adapter with 8 or 12 nt UMI ligated to the DSB in situ. Measured as: unique DSB per 10^5 reads.	Cumulative 44% (56/128)	- Reads clustering to identify DSB groups - Reads pairwise minimal distance to filter out background signal - Comparison with UT control - Guide homology filtering: <= 4 mismatches or <= 2 gaps	With designer nucleases sensitivity between 0.2-5% as compared with indels analysis via NGS	Low sensitivity. Laborious. Guide homology based filtering.	In vitro transcription barcoding and amplification strategy. Good validation rate.	Yan et al., 2017 Yan et al., 2019
DISCOVER-seq	in cellula	5*10^6 (minimum), 1*10^7 cells (recommended) (Wienert et al., 2020)	yes	Semi-quantitative Measured as: DISCOVER score	96% (44/46 validated out of 57, VEGFA site 2)	1. Identify loci with stacks of blunt ends 2. Filter-out loci found in ENCODE ChIP-seq blacklist and in control sample 3. PAM search 4. Calculate DISCOVER score (Ds)=reads in 10bp window surrounding the hypothetical cut site 5. Guide homology filter:<8 mismatches with Ds >3; <6 mismatches with Ds >3; <4mismatches with Ds >2.	0.3-1.5% as compared within triplicates and Guide-seq derived Off-target sites validated by NGS	Time point dependent. High cell number needed. Gaps not counted during the guide homology filtering.	Good validation rate	Wienert et al., 2019 Wienert et al., 2020
CIRCLE-seq	in vitro	25 μg of gDNA	no	Semi-quantitative Measured as: read count within 20 bp from predicted cleavage site.	Top 59 tested out of 496 sites, 35% (21) validated (VEGFA site 1)	"The interval and 20 bp of flanking reference sequence on either side were searched for potential nuclease-induced off-target sites with an edit distance of less than or equal to six, allowing for gaps." Possible use of an algorithm independent from any genomic sequence reference	N/A "Higher signal-to-noise ratios relative to those of Digenome-seq and using approximately 100-fold fewer sequencing reads."	Numbers of potential Off-target sites may be over 100 sites. Thorough validation needed for treated cells. False negatives possible due to the alignment threshold imposed.	It detects more sites than in-cellula techniques. Could be potentially used in a reference-independent fashion.	Tsai et al., 2017
CHANGE-seq	in vitro	1 μg gDNA	no	Semi-quantitative Measured as: read count within 20 bp from predicted cleavage site	Top 641 tested out of 11236 sites, 34% (221) validated (cumulative)	Use of CIRCLE-seq analysis	N/A Improved efficiency with respect to CIRCLE-seq	Numbers of potential Off-target sites may be over 100 sites. Thorough validation needed for treated cells. False negatives possible due to the alignment threshold imposed.	Returns a wide view of most of the potential Off-target site. Could be potentially used in a reference-independent fashion.	Tsai et al., 2020
SITE-seq	in vitro	7.5-10 μg of gDNA	no	Semi-quantitative Measured as: read count	top 176 tested out of 273 sites, 3.9% (7) validated (FANCF) top 423 tested out of 1646, 10.2% (43) validated (VEGFA site 1) top 204 tested out of 517, 0.4% (2) validated (PTPRC target2) top 156 tested out of 168, 0.6% (1) validated (PTPRC target5) top 182 tested out of 377, 4.9% (9) validated (PAPSS2) top 178 tested out of 2305, 6.2% (11) validated (CD34) top 127 tested out of 134, 0% (0) validat…	1- Peak calling 2- Peak filtering for 5' reads aligned on both strands within 3 bp from the cut site 3- (optional) Guide homology filtering	Sensitive enough to detect off-target sites at which indels are induced with a frequency of 0.1% or lower, near the detection limit of high-throughput sequencing platforms with the use of 0.6-2.5 million reads.	Low validation rate.	High sensitivity obtained with low sequencing depth. It may not depend on guide homology filtering	Cameron et al., 2017
Multiplex Digenome-seq	in vitro	8 μg gDNA	no	Semi-quantitative Measured as: DNA cleavage score (function of reads amount)	Top 259 tested out of 944, 53% (137) validated (Cumulative)	1- DNA cleavage score assigned to every nucletiode. Algorithm based on coverage and the 5' reads aligned on both strands within 1-5 bp from the cut site. 2- DNA cleavage score threshold of 2.5 or 0.1	Sensitive enough to detect off-target sites at which indels are induced with a frequency of 0.1% or lower, near the detection limit of high-throughput sequencing platforms.	Requires good (>30x) whole genome sequencing coverage.	It does not depend on guide homology filtering. Multiplexing of different nucleases possible.	Kim et al., 2016 Kim et al, 2015
DIG-seq	in vitro	5 × 10^5 cells	no	Semi-quantitative Measured as: DNA cleavage score (function of reads amount)	6.9% (43) validated (HBB) 56.6% (30) validated (VEGFA site 1) 33.3% (36) validated (FANCF) 60% (5) validated (HEK3) 33.3% (3) validated (RNF2) 50% (2) validated (HEK2) 28.6% (14) validated (EMX1) 100% (1) validated (CCR5-9) 31.3% (134) validated (cumulative)	1- DNA cleavage score assigned to every nucletiode. Algorithm based on coverage and the 5' reads aligned on both strands within 1-5 bp from the cut site. 2- DNA cleavage score threshold of 0.1	Sensitive enough to detect off-target sites at which indels are induced with a frequency of 0.1% or lower, near the detection limit of high-throughput sequencing platforms.	Requires good (>30x) whole genome sequencing coverage.	Accounts for target cell chromatin status. It does not depend on guide homology filtering.	Kim et al., 2018
$Validation rate: ratio between NGS validated sites and the total number of sites detected in the original or in the referenced publication. Validated sites absolute amount reported in brackets.
*Sensitivity estimated considering the lowest site mutation rate validated by NGS.
